# Supplementary material for: Potential of various minerals and their biogeochemical implications for ocean alkalinity enhancement in the southeastern Arabian Sea
Source: Copernicus journal article supplement (doi:10.5194/egusphere-2025-3925), 2025-08-26
Supplement: Supplementary file 1 [file egusphere-2025-3925-supplement.pdf]

*Supplement of*

## **Potential of various minerals and their biogeochemical implications for ocean alkalinity enhancement in the southeastern Arabian Sea**

**Shreya Mehta et al.**

*Correspondence to:* Arvind Singh (arvinds@prl.res.in)

## **Contents**

- Text S1
- Figure S1
- Table S1
- Figure S2

### **Text S1: XRF and XRD analysis**

The chemical composition analysis of the minerals was carried out using X-ray fluorescence spectrometry (XRF), and the oxide concentrations were measured in an X-Ray Fluorescent (XRF) spectrometer (Rigaku<sup>®</sup>). For determining the loss of ignition (LOI), powdered sample was heated overnight at 100°C to remove the moisture. A 5g of this sample was accurately weighed and heated in a preheated muffle furnace (Thermo<sup>®</sup>) at 1050°C. LOI corresponded to the loss of weight in percentage. For XRF analysis, 4 g of sample was weighed and mixed with 1 g of wax binder (Chemplex<sup>®</sup>) in an agate mortar. Thin pellets for XRF were formed from the mixture by transferring it into standard aluminium cups and pressing against a compressor. For calibration, pellets of international rock standards were used. The XRF instrument was operated at 50 KV, and P10 gas flow rate was 24.7mL min<sup>-1</sup>.

The mineral phases were identified using the X-ray diffraction (XRD) technique. The XRD measurements were performed using a D2 PHASER, Bruker<sup>®</sup>, with a Cu target ( $\lambda = 1.54056 \text{ \AA}$ ) and Ni filter operated at 30 KV voltage and 20 mA current. The diffraction patterns obtained were compared with the International Centre for Diffraction Data (ICDD<sup>®</sup>) database for mineral identification. The diffraction patterns obtained are shown in Figure S2.

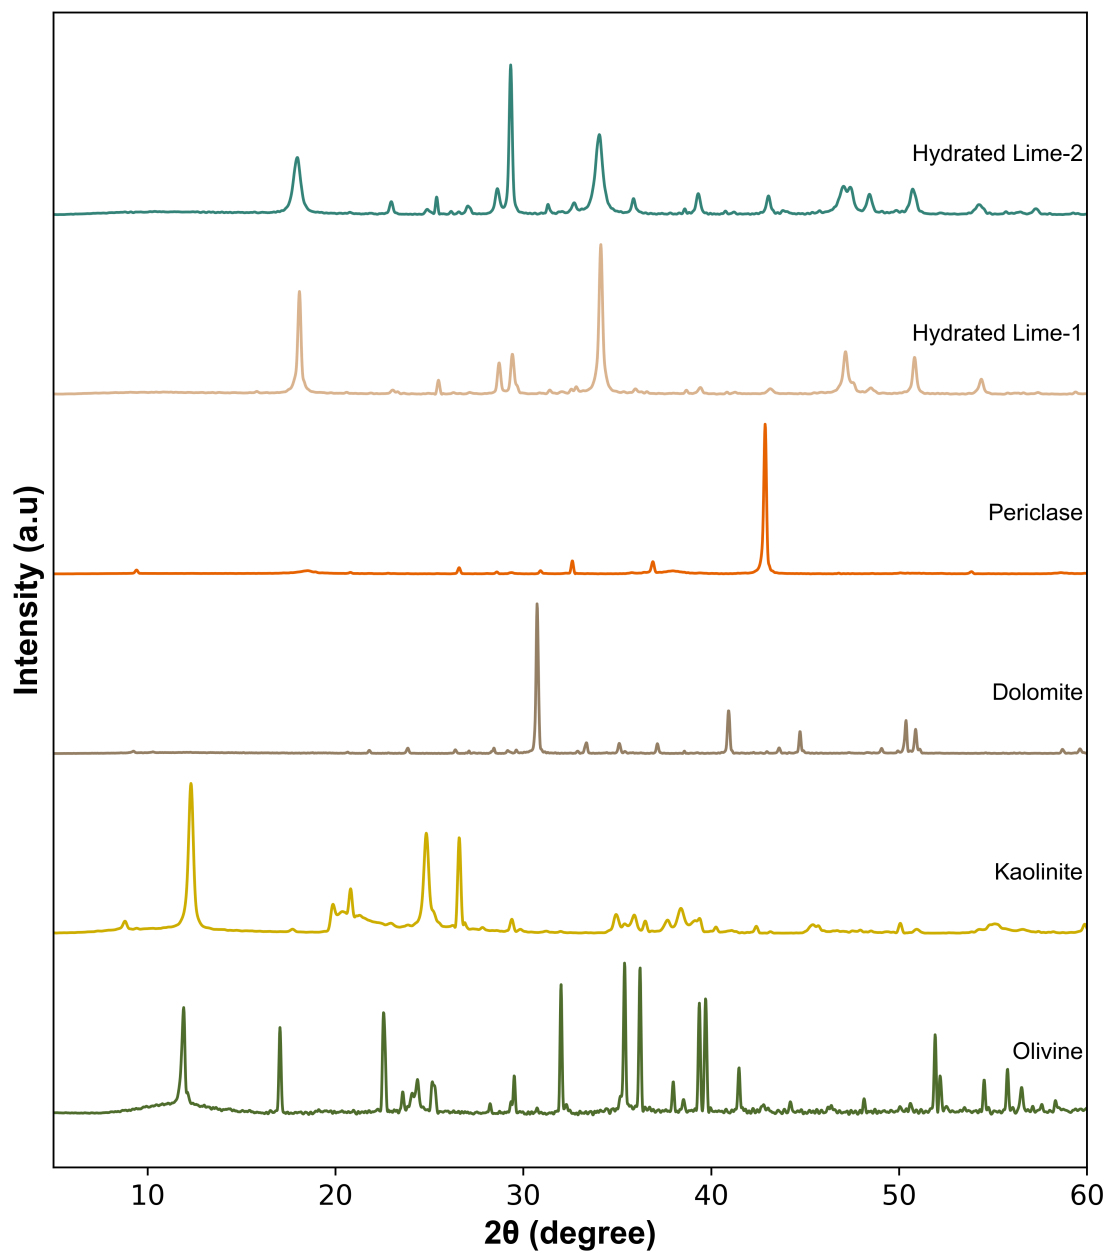

**Figure S1:** XRD profiles of various powdered minerals. The x-axis represents the diffraction angle ( $2\theta$ ), while the y-axis shows the normalized intensity.

**Table S1.** GAMs summary: The "Estimate" is the mean effect (the measure of mean differences between the groups). A positive estimate indicates that the estimated mean effect of treatment is higher than the reference (control or any other treatment), while a negative estimate indicates a lower effect. "P-means" and "P-smooths" represent the  $p$  value of the estimated mean and for the smooth terms, respectively. The  $p$  value of  $<0.05$  indicates statistically significant differences in either the means or the trends between groups.  $R_{adj}$  is the adjusted  $R^2$  value.

| Variable           | Treatment Comparison                            | Estimate | P-means | P-smooths | $R_{adj}$ |
|--------------------|-------------------------------------------------|----------|---------|-----------|-----------|
| Alkalinity         | Control - olivine (+250)                        | -5       | 0.8     | 0.2       | 0.92      |
|                    | Control - olivine (+500)                        | -22      | 0.2     | 0.07      |           |
|                    | Control - kaolinite (+250)                      | 15       | 0.4     | 0.2       |           |
|                    | Control - dolomite (+250)                       | -2       | 0.9     | 0.2       |           |
|                    | Control - hydrated lime-1 (+250)                | 122      | $<0.05$ | 0.4       |           |
|                    | Control - hydrated lime-2 (+250)                | 145      | $<0.05$ | 0.2       |           |
|                    | Control - hydrated lime-2 (+500)                | 364      | $<0.05$ | $<0.05$   |           |
|                    | Control - Periclase (+500)                      | 363      | $<0.05$ | $<0.05$   |           |
|                    | olivine (+250) - olivine (+500)                 | -17      | 0.5     | 0.5       |           |
|                    | hydrated lime-2 (+250) - hydrated lime-2 (+500) | 219      | $<0.05$ | 0.05      |           |
| pH                 | Control - olivine (+250)                        | 0.06     | $<0.05$ | $<0.05$   | 0.90      |
|                    | Control - olivine (+500)                        | 0.05     | $<0.05$ | 0.08      |           |
|                    | Control - kaolinite (+250)                      | 0.08     | $<0.05$ | $<0.05$   |           |
|                    | Control - dolomite (+250)                       | 0.08     | $<0.05$ | $<0.05$   |           |
|                    | Control - hydrated lime-1 (+250)                | 0.2      | $<0.05$ | 0.1       |           |
|                    | Control - hydrated lime-2 (+250)                | 0.3      | $<0.05$ | 0.3       |           |
|                    | Control - hydrated lime 2 (+500)                | 0.4      | $<0.05$ | $<0.05$   |           |
|                    | Control - Periclase (+500)                      | 0.5      | $<0.05$ | $<0.05$   |           |
|                    | olivine (+250) - olivine (+500)                 | -0.01    | 0.7     | 0.5       |           |
|                    | hydrated lime-2 (+250) - hydrated lime-2 (+500) | 0.2      | $<0.05$ | $<0.05$   |           |
| DIC                | Control - olivine (+250)                        | -29      | 0.2     | $<0.05$   | 0.72      |
|                    | Control - olivine (+500)                        | -24      | 0.3     | 0.2       |           |
|                    | Control - kaolinite (+250)                      | -42      | 0.05    | $<0.05$   |           |
|                    | Control - dolomite (+250)                       | -23      | 0.3     | $<0.05$   |           |
|                    | Control - hydrated lime-1 (+250)                | -2       | 0.9     | 0.4       |           |
|                    | Control - hydrated lime-2 (+250)                | 17       | 0.5     | 0.4       |           |
|                    | Control - hydrated lime 2 (+500)                | 90       | $<0.05$ | $<0.05$   |           |
|                    | Control - Periclase (+500)                      | 32       | 0.1     | 0.08      |           |
|                    | olivine (+250) - olivine (+500)                 | 5        | 0.8     | 0.4       |           |
|                    | hydrated lime-2 (+250) - hydrated lime-2 (+500) | 73       | $<0.05$ | $<0.05$   |           |
| $\Omega_{calcite}$ | Control - olivine (+250)                        | 0.4      | 0.1     | 0.4       | 0.92      |
|                    | Control - olivine (+500)                        | 0.3      | 0.1     | 0.2       |           |
|                    | Control - kaolinite (+250)                      | 0.5      | $<0.05$ | 0.3       |           |
|                    | Control - dolomite (+250)                       | 0.6      | $<0.05$ | 0.2       |           |
|                    | Control - hydrated lime-1 (+250)                | 1.9      | $<0.05$ | 0.5       |           |
|                    | Control - hydrated lime-2 (+250)                | 2.1      | $<0.05$ | 0.3       |           |
|                    | Control - hydrated lime 2 (+500)                | 4.2      | $<0.05$ | $<0.05$   |           |

|                      |                                                 |       |       |       |      |
|----------------------|-------------------------------------------------|-------|-------|-------|------|
|                      | Control - Periclase (+500)                      | 5.5   | <0.05 | <0.05 |      |
|                      | olivine (+250) - olivine (+500)                 | -0.05 | 0.8   | 0.8   |      |
|                      | hydrated lime-2 (+250) - hydrated lime-2 (+500) | 2.1   | <0.05 | <0.05 |      |
| $\Omega_{aragonite}$ | Control - olivine (+250)                        | 0.2   | 0.1   | 0.4   | 0.92 |
|                      | Control - olivine (+500)                        | 0.2   | 0.1   | 0.3   |      |
|                      | Control - kaolinite (+250)                      | 0.3   | <0.05 | 0.3   |      |
|                      | Control - dolomite (+250)                       | 0.4   | <0.05 | 0.2   |      |
|                      | Control - hydrated lime-1 (+250)                | 1.2   | <0.05 | 0.5   |      |
|                      | Control - hydrated lime-2 (+250)                | 1.4   | <0.05 | 0.4   |      |
|                      | Control - hydrated lime 2 (+500)                | 2.8   | <0.05 | <0.05 |      |
|                      | Control - Periclase (+500)                      | 3.7   | <0.05 | <0.05 |      |
|                      | olivine (+250) - olivine (+500)                 | -0.02 | 0.8   | 0.8   |      |
|                      | hydrated lime-2 (+250) - hydrated lime-2 (+500) | 1.4   | <0.05 | <0.05 |      |
| $pCO_2$              | Control - olivine (+250)                        | -176  | <0.05 | <0.05 | 0.91 |
|                      | Control - olivine (+500)                        | -149  | <0.05 | <0.05 |      |
|                      | Control - kaolinite (+250)                      | -202  | <0.05 | <0.05 |      |
|                      | Control - dolomite (+250)                       | -212  | <0.05 | <0.05 |      |
|                      | Control - hydrated lime-1 (+250)                | -489  | <0.05 | <0.05 |      |
|                      | Control - hydrated lime-2 (+250)                | -512  | <0.05 | <0.05 |      |
|                      | Control - hydrated lime 2 (+500)                | -673  | <0.05 | <0.05 |      |
|                      | Control - Periclase (+500)                      | -785  | <0.05 | <0.05 |      |
|                      | olivine (+250) - olivine (+500)                 | 25    | 0.5   | 0.1   |      |
|                      | hydrated lime-2 (+250) - hydrated lime-2 (+500) | -158  | <0.05 | <0.05 |      |

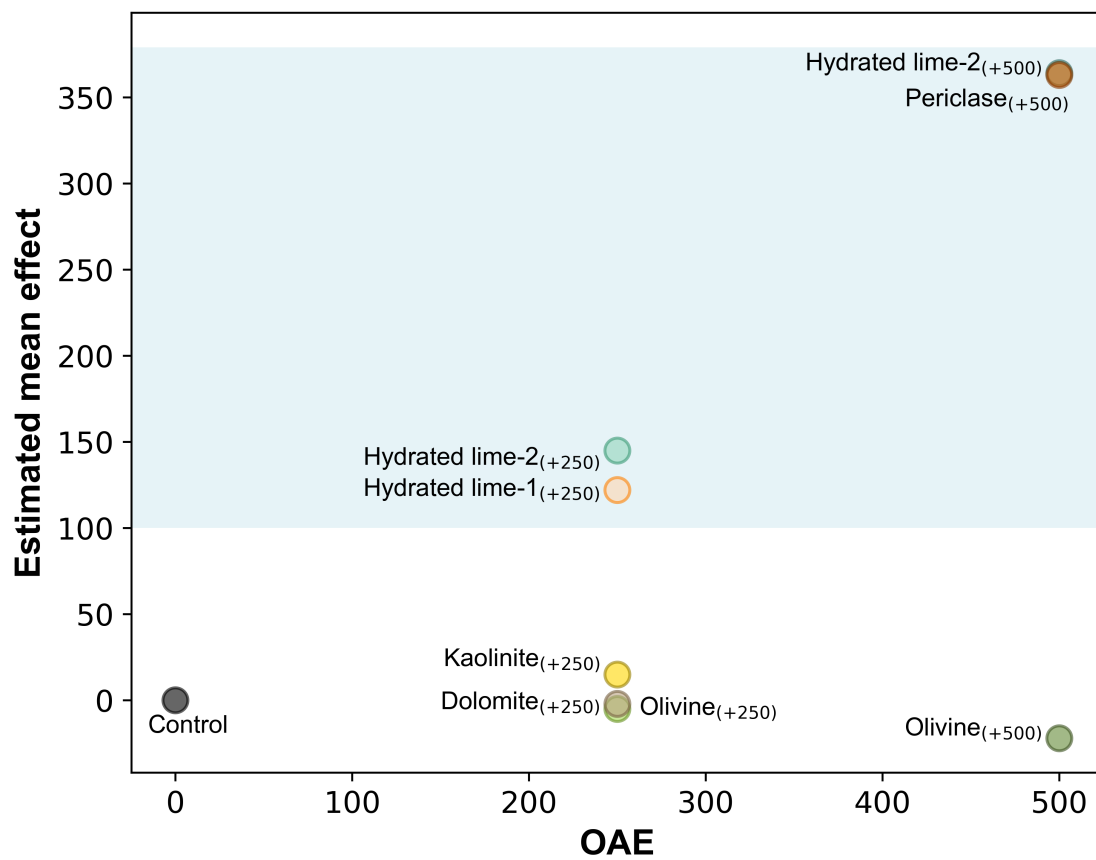

**Figure S2:** Estimated mean effect (difference in the mean of treatment and control) for various treatments and control over a period of nine days. The x-axis represents the amount of added alkalinity, whereas the y-axis represents the mean effect. The shaded blue region depicts mean effects for mesocosms to which industrially produced minerals were added.
